# Supplementary material for: Développement d'une technique de mesure in situ de contraintes dans les couches minces : application à la mesure des contraintes intrinsèque et thermique
Source: Royal Society of Chemistry journal article supplement (doi:10.1039/c6cp07269k), 1997-01-01
Supplement: c6cp07269k1.pdf [file c6cp07269k1.pdf]

## Electronic Supplementary Information

### Designing Hierarchical Hollow Nanostructures of $\text{Cu}_2\text{MoS}_4$ for Improved Hydrogen Evolution Reaction

Ke Zhang,<sup>a</sup> Yongli Zheng,<sup>b</sup> Yunxiang Lin,<sup>a</sup> Changda Wang,<sup>a</sup> Hengjie Liu,<sup>a</sup> Daobin Liu,<sup>a</sup> Chuanqiang Wu,<sup>a</sup> Shuangming Chen,<sup>a</sup> Yanxia Chen,<sup>\*b</sup> and Li Song<sup>\*a</sup>

#### Preparation of $\text{Cu}_2\text{O}$ nanocrystals

The synthesis of  $\text{Cu}_2\text{O}$  nanocrystals was similar to the previous reports with minor modifications.<sup>1</sup> Typically, 0.342 g  $\text{CuCl}_2\cdot\text{H}_2\text{O}$  and 6.666 g poly (vinyl pyrrolidone) (PVP) were dissolved in 100 mL deionized water, then NaOH aqueous solution ( $2.0 \text{ mol}\cdot\text{L}^{-1}$ , 10.0 mL) were added to the solution. After 30 mins' stirring, ascorbic acid aqueous solution ( $0.6 \text{ mol}\cdot\text{L}^{-1}$ , 10.0 mL) were added with an intensive magnetic stirring for 1 h. Then orange liquid was obtained. The product was collected by centrifugation and subsequently washed several times by deionized water and absolute ethanol. Finally dried for several hours.  $\text{Cu}_2\text{O}$  nanocrystals with different morphologies and sizes were obtained in different conditions. The corresponding parameters are listed in SI Table 1.

**SI Table 1. The reaction parameters for different  $\text{Cu}_2\text{O}$  nanocrystals.**

| Morphology | PVP | Reaction        | Dropping speed | Size/nm |
|------------|-----|-----------------|----------------|---------|
|            |     | temperature/ °C |                |         |
| Nanosphere | Yes | 20              | quick          | 60~80   |
| Nanosphere | Yes | 20              | slow           | 200~300 |
| Octahedron | Yes | 40              | slow           | 500~600 |
| Cube       | No  | 40              | slow           | 400~500 |

Yes: PVP was added in the reaction system;

No: PVP was not added.

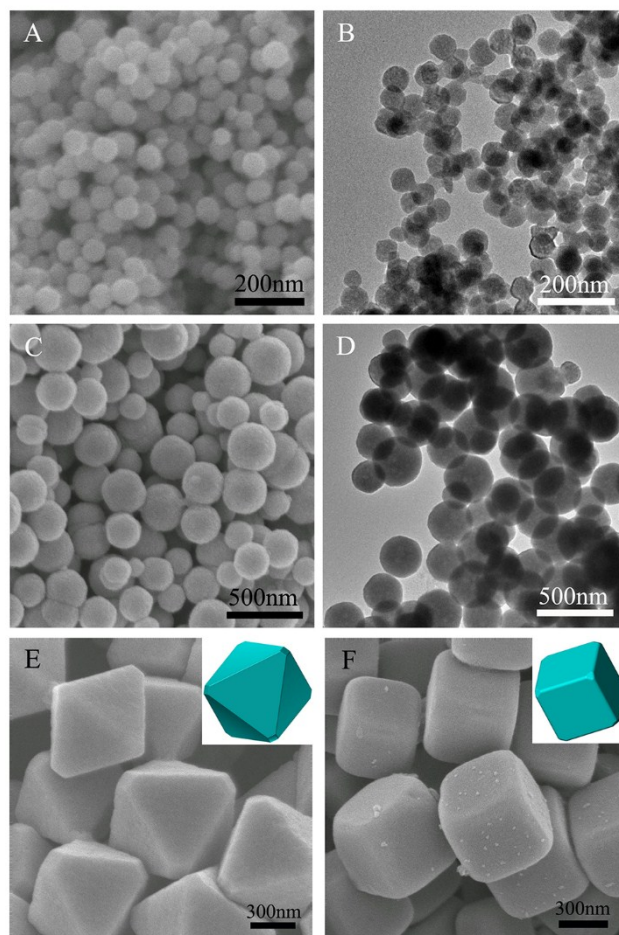

**Fig. S1.** SEM and TEM images of Cu<sub>2</sub>O crystals with different morphologies and sizes. A and B are images of sphere-like Cu<sub>2</sub>O nanocrystals with size about 60~80 nm, while C and D are images of Cu<sub>2</sub>O spheres with size range from 200~300 nm. E shows truncated-octahedral Cu<sub>2</sub>O crystals with size about 500~600 nm and F shows truncated-cubic Cu<sub>2</sub>O crystals with size about 400~500 nm.

### Preparation of $\text{Cu}_2\text{MoS}_4$ nanosheets and nanoparticles

The synthesis of  $\text{Cu}_2\text{MoS}_4$  nanosheets is described in our recent work (Small, 2014, 10, 4637.). When the solvothermal reaction is carried out at 160 °C for 12 h,  $\text{Cu}_2\text{MoS}_4$  nanoparticles with size about 40~60 nm are obtained (AIP Advances, 2015, 5, 077130).

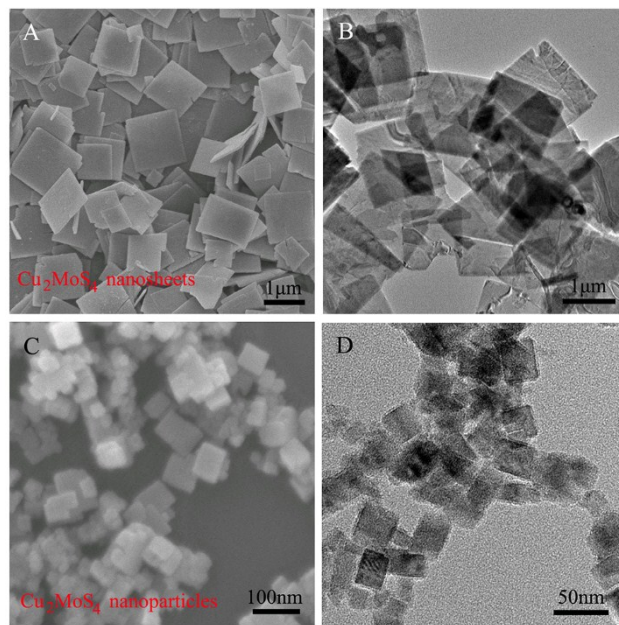

**Fig. S2.** SEM and TEM images of  $\text{Cu}_2\text{MoS}_4$  at different morphologies. A and B are  $\text{Cu}_2\text{MoS}_4$  nanosheets, while C and D are  $\text{Cu}_2\text{MoS}_4$  nanoparticles.

### EDX spectrum of $\text{Cu}_2\text{MoS}_4$ hollow nanoflowers

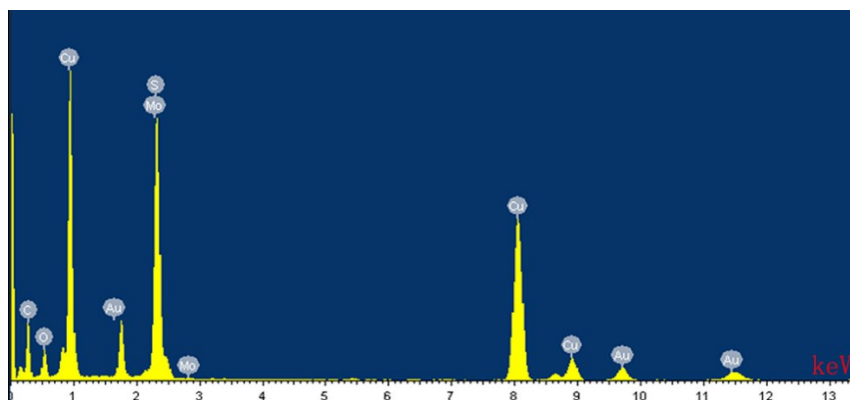

**Fig. S3.** EDX spectrum of  $\text{Cu}_2\text{MoS}_4$  hollow nanoflowers.

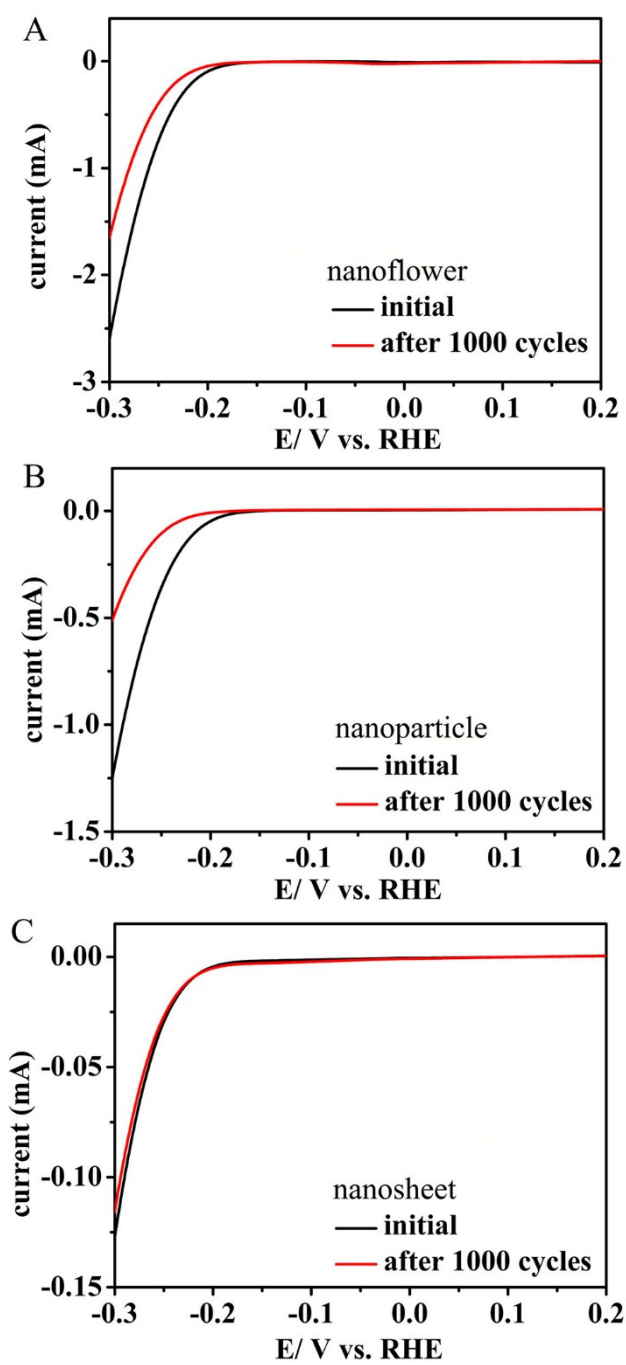

**Fig. S4.** durability test of nanoflower (A), nanoparticle (B) and nanosheet (C).

## References

- 1 D. F. Zhang, H. Zhang, L. Guo, K. Zheng, X. D. Han and Z. Zhang, *J. Mater. Chem. A* 2009, **19**, 5220-5225.
